# Supplementary material
Source: ML conference proceedings conference paper supplement (https://proceedings.neurips.cc/paper_files/paper/2022/hash/fa93d7bfb48450e1af63c8fa647d317f-Abstract.html)
Supplement: Supplementary file 1 [file fa93d7bfb48450e1af63c8fa647d317f-Supplemental-Conference.zip]

Archive with 1 entries (1 files):
- ScaoedNet_neurips_supp_2022_Camera_Ready.pdf
